# Supplementary material for: Alaska Native genomic research: perspectives from Alaska Native leaders, federal staff, and biomedical researchers
Source: PubMed Central journal article supplement (PMC7708301; doi:10.1038/s41436-020-0926-y), 2020-08-25
Supplement: 41436_2020_926_MOESM1_ESM.pdf [file 41436_2020_926_MOESM1_ESM.pdf]

Supplementary Table 1: Alaska Native Genomic Research Workshop, Participant Roster

| First Name | Last Name        | Degree(s)        | Organization Affiliation                  |
|------------|------------------|------------------|-------------------------------------------|
| Charles    | Anderson         |                  | Southcentral Foundation                   |
| Charlene   | Apok             | MA               | Southcentral Foundation                   |
| Michelle   | Aregood          |                  | Southcentral Foundation                   |
| Bernadine  | Atchison         |                  | Kenaitze Indian Tribe                     |
| Jaedon     | Avey             | PhD              | Southcentral Foundation                   |
| Brian      | Barnes           | PhD, BS          | University of Alaska Fairbanks            |
| Andrea     | Beckel-Mitchener | PhD              | National Institute of Mental Health       |
| Juliana    | Blome            | PhD              | Environmental influences of Child Health  |
| Verne      | Boerner          |                  | Outcomes Alaska Native Health Board       |
| Clara      | Boerner          |                  | Alaska Native Health Board                |
| Vence      | Bonham           | JD               | National Human Genome Research Institute  |
| Bert       | Boyer            | PhD              | Oregon Health Sciences University         |
| Larry      | Brody            | PhD              | National Human Genome Research Institute  |
| Tamara     | Brown            |                  | Southcentral Foundation                   |
| Wylie      | Burke            | PhD, MD          | University of Washington                  |
| Karen      | Caindec          |                  | Southcentral Foundation                   |
| Esther     | Cetina           | MS               | Southcentral Foundation                   |
| Karen      | Cheung           | MPH              | Southcentral Foundation                   |
| Ashley     | Christiansen     | MBA              | Southcentral Foundation                   |
| Katrina    | Claw             | PhD              | University of Washington                  |
| Noah       | Collins          |                  | Alaska Native Tribal Health Consortium    |
| Louie      | Commack          |                  | Maniilaq Association                      |
| Verlyn     | Corbett          | MD               | Southcentral Foundation                   |
| Denise     | Dillard          | PhD              | Southcentral Foundation                   |
| Carla      | Easter           | PhD              | National Human Genome Research Institute  |
| Doug       | Eby              | MD, MPH          | Southcentral Foundation                   |
| Michael    | Engelgau         | MD, MS           | National Heart, Lung, and Blood Institute |
| David      | Farve            |                  | Southcentral Foundation                   |
| Elizabeth  | Ferucci          | MD               | Alaska Native Tribal Health Consortium    |
| Joshua     | Franks           |                  | Cook Inlet Tribal Council, Inc.           |
| Francine   | Gachupin         | PhD, MPH,<br>CIP | University of Arizona                     |
| Donna      | Galbreath        | MD               | Southcentral Foundation                   |
| Bart       | Garber           |                  | Kenaitze Indian Tribe                     |
| Stephen    | Gerrish          |                  | Tanana Chiefs                             |
| Armen      | Ghazarian        | PhD              | National Cancer Institute                 |
| Jasmine    | Gil              |                  | Alaska Native Tribal Health Consortium    |
| Greta      | Goto             |                  | Bristol Bay Native Corporation            |
| Kevin      | Gottlieb         | DDS              | Southcentral Foundation                   |
| Katherine  | Gottlieb         | MBA, DPS         | Southcentral Foundation                   |
| Tiffany    | Guinn            | MA               | Southcentral Foundation                   |

|           |                  |                 |                                            |
|-----------|------------------|-----------------|--------------------------------------------|
| Michael   | Hahn             |                 | National Human Genome Research Institute   |
| Tom       | Hennessy         | MD, MPH         | Centers for Disease Control and Prevention |
| Lucia     | Hindorff         | PhD             | National Human Genome Research Institute   |
| Vanessa   | Hiratsuka        | PhD, MPH        | Southcentral Foundation                    |
| Matt      | Hirschfield      | MD              | Southcentral Foundation                    |
| Mike      | Hirst            |                 | Southcentral Foundation                    |
| Sara      | Hull             | PhD             | National Human Genome Research Institute   |
| Roy       | Hundorff         |                 | Southcentral Foundation                    |
| Gail      | Jarvik           | PhD, MD         | University of Washington                   |
| Andrew    | Jimmie           |                 | Tanana Chiefs Conference                   |
| Sonya     | Jooma            | MA              | National Human Genome Research Institute   |
| David     | Koeller          | MD              | Oregon Health Sciences University          |
| Cassandra | Kroto            |                 | Native Village of Tyonek                   |
| April     | Kyle             |                 | Southcentral Foundation                    |
| Breanna   | Lameman          |                 | Alaska Native Tribal Health Consortium     |
| Ted       | Mala             | MD              | Southcentral Foundation                    |
| Spero     | Manson           | PhD             | University of Colorado Denver              |
| Marjorie  | Mau              | MD, MS,<br>MACP | University of Hawai'i at Mānoa             |
| Brian     | McMahon          | MD              | Alaska Native Tribal Health Consortium     |
| Denise    | Morris           |                 | Southcentral Foundation                    |
| Frederick | Murray           |                 | Norton Sound Health Corporation            |
| Sarah     | Nash             | PhD, BA,<br>MPH | Alaska Native Tribal Health Consortium     |
| Charlene  | Naulty           |                 | Aleut community of St. Paul Island         |
| Jaylene   | Person-Nyren     |                 | Southcentral Foundation                    |
| Terry     | Powell           | BBA             | Alaska Native Tribal Health Consortium     |
| Ricco     | Ramos            |                 | Southcentral Foundation                    |
| Dara      | Richardson-Heron | MD              | All of Us Research Program                 |
| Austen    | Rogers           |                 | Southcentral Foundation                    |
| Mike      | Ryan-Todd        | MA              | Southcentral Foundation                    |
| Oliver    | Sam              |                 | Southcentral Foundation                    |
| Krista    | Schaefer         | MPH             | Southcentral Foundation                    |
| James     | Segura           |                 | Southcentral Foundation                    |
| Aliassa   | Shane            |                 | Southcentral Foundation                    |
| Jennifer  | Shaw             | PhD             | Southcentral Foundation                    |
| Terry     | Simpson          | MD              | Southcentral Foundation                    |
| Rosalyn   | Singleton        | MD, MPH         | Centers for Disease Control and Prevention |
| Marie     | Stewman          | MBA             | Southcentral Foundation                    |
| Ileen     | Sylvester        | MBA             | Southcentral Foundation                    |
| Larissa   | Tapia            |                 | Southcentral Foundation                    |
| Timothy   | Thomas           | MD              | Alaska Native Tribal Health Consortium     |
| Shirley   | Thompson         |                 | Southcentral Foundation                    |

|          |          |     |                                                                 |
|----------|----------|-----|-----------------------------------------------------------------|
| Steve    | Tierney  | MD  | Southcentral Foundation                                         |
| Michelle | Tierney  | PhD | Southcentral Foundation                                         |
| Susan    | Trinidad | MA  | University of Washington                                        |
| Jennifer | Troyer   | PhD | National Human Genome Research Institute                        |
| Alberta  | Unok     |     | Alaska Native Health Board                                      |
| Malia    | Villegas | EdD | Native Village of Afognak                                       |
| Hina     | Walajahi |     | National Human Genome Research Institute                        |
| June     | Walunga  |     | Norton Sound Health Corporation                                 |
| Kyle     | Wark     | MA  | Southcentral Foundation                                         |
| Laurie   | Wiese    |     | Southcentral Foundation                                         |
| Scott    | Williams |     | Southcentral Foundation                                         |
| David    | Wilson   | PhD | National Institutes of Health, Tribal Health<br>Research Office |
| Abbie    | Wolfe    | MA  | Alaska Native Tribal Health Consortium                          |
| R. Brian | Woodbury |     | Southcentral Foundation                                         |
| Tina     | Woods    | PhD | Alaska Native Tribal Health Consortium                          |
| Diana    | Zirul    |     | Kenaitze Indian Tribe                                           |

Supplementary Table 2: Alaska Native Genomic Research Workshop - Agenda  
 Location: Nuka Learning and Wellness Center, Tribal Drum room, 4085 Tudor Centre Drive,  
 Anchorage, Alaska 99508

---

|                  |                    |                                                                                                                                                                                                                                                                                                                                              |
|------------------|--------------------|----------------------------------------------------------------------------------------------------------------------------------------------------------------------------------------------------------------------------------------------------------------------------------------------------------------------------------------------|
| Day 1            |                    | Blessing                                                                                                                                                                                                                                                                                                                                     |
| July 10,<br>2018 | 8:00 – 8:15 am     | Ileen Sylvester                                                                                                                                                                                                                                                                                                                              |
|                  |                    | Welcome                                                                                                                                                                                                                                                                                                                                      |
|                  | 8:15 – 8:30 am     | Chief Andrew Jimmie (Alaska Native Health Board [ANHB] Chair)<br>and Verné Boerner (ANHB CEO)<br>Katherine Gottlieb (Southcentral Foundation [SCF] President/CEO)<br>Vence Bonham (National Human Genome Research<br>Institute[NHGRI])                                                                                                       |
|                  | 8:30 – 9:00 am     | Introductions<br>Moderator: Charlene Aqpiq Apok, SCF                                                                                                                                                                                                                                                                                         |
|                  | 9:00 – 9:15 am     | Charge for the Workshop<br>Denise Dillard (SCF) and Vence Bonham (NHGRI)<br><ul style="list-style-type: none"> <li>· Acknowledgement of the work done to date</li> <li>· Opportunities, priorities, and challenges in moving forward to expand genetic research and genomic medicine</li> </ul> National Institutes of Health (NIH) Overview |
|                  | 9:15 – 9:45 am     | Dave Wilson<br><ul style="list-style-type: none"> <li>· Describe the mission and vision for the NIH Tribal Health Research Office</li> <li>· Discuss engagement of tribal communities with NIH</li> </ul> NHGRI Overview                                                                                                                     |
|                  | 9:45– 10:15 am     | Larry Brody, Lucia Hindorff, Jennifer Troyer<br><ul style="list-style-type: none"> <li>· Mission and vision and structure</li> <li>· Research priorities</li> <li>· Integration of genomics into clinical care</li> <li>· Ethical, legal, and social implications of genomics research</li> </ul> NIH Research Overview                      |
|                  | 10:15 – 11:30 am   | Juliana Blome (Environmental influences on Child Health Outcomes [ECHO] Program)<br>Andrea Beckel-Mitchener (National Institute of Mental Health)<br>Michael Engalgau (National Heart, Lung, and Blood Institute)<br>Armen Ghazarian (National Cancer Institute)<br>Dara Richardson-Heron ( <i>All of Us</i> Research Program)               |
|                  | 11:30 – 12:30 pm   | Lunch                                                                                                                                                                                                                                                                                                                                        |
|                  | 12:30 am – 1:00 pm | Genomic Research Opportunities Panel<br>Tribal Leader: Esai Twitchell Jr.<br>Researcher: Gail Jarvik<br>NIH: Lucia Hindorff                                                                                                                                                                                                                  |

1:00 – 1:45 pm Small Group Discussion on Opportunities  
 1:45 – 2:30 pm Report out on Opportunities  
 2:30 – 2:45 pm Break  
 Challenges Panel (Tribal leader, researcher, NIH)  
 Tribal Leader: Karen Caindec  
 Researcher: Francine Gachupin  
 NIH: Jennifer Troyer  
 2:45 – 3:15 pm  
 3:15 – 4:00 pm Small Group Discussion on Challenges  
 4:00 – 4:30 pm Report Out on Challenges  
 4:30 – 4:45 pm Participant Reflections  
 4:45 – 5:00 pm Closing and Next Day Preview  
 5:00 – 6:00 pm Networking Reception

---

Day 2  
 July 11,  
 2018

8:00 – 8:15 am Blessing  
 Lisa Dolchok (SCF Tribal Doctor)

8:15 – 8:30 am Welcome Back  
 Chief Andrew Jimmie (ANHB Chair) & Verné Boerner (ANHB CEO),  
 Katherine Gottlieb (SCF President/CEO), Vence Bonham (NHGRI)  
 Other Participant Reflections from Day One

8:30 – 9:00 am Moderator: Charlene Aqpiq Apok, SCF  
 Charge for Day Two  
 Denise Dillard and Vence Bonham

9:00 – 9:45 am Data Sharing Approaches Panel (Tribal leader, researcher, NIH)  
 Tribal Leader: Charlene Naulty  
 Researcher: Bert Boyer  
 NIH: Sara Hull, Sonya Jooma

9:45 – 10:30 am Small Group Discussion on Data Sharing Approaches  
 10:30 – 11:30 am Report Out on Data Sharing Approaches  
 11:30 – 12:30 pm Lunch

12:30 – 1:00 pm Priorities Panel (Tribal leader, researcher, NIH)  
 Tribal Leader: Tina Woods  
 Researcher: Wylie Burke  
 NIH: Larry Brody

1:00 – 1:45 pm Small Group Discussion on Priorities  
 1:45 – 2:30 pm Report out on Priorities  
 2:30 – 3:30 pm Participant Reflections  
 Workshop Closing  
 3:30 – 4:00 pm Denise Dillard and Vence Bonham

---
